# Supplementary material
Source: PubMed Central journal article supplement (PMC8969205)
Supplement: NIHMS1784862-supplement-2.pdf [file NIHMS1784862-supplement-2.pdf]

## SUPPLEMENTAL INFORMATION

### **Non-targeted metabolomics and associations with per- and polyfluoroalkyl substances (PFAS) exposure in humans: A scoping review**

*Pengfei Guo<sup>a,b</sup>, Tristan Furnary<sup>a</sup>, Vasilis Vasiliou<sup>a</sup>, Qi Yan<sup>c</sup>, Kate Nyhan<sup>a,d</sup>, Dean P. Jones<sup>e,f</sup>, Caroline H. Johnson<sup>a</sup>, Zeyan Liew<sup>a,b,\*</sup>*

<sup>a</sup> Department of Environmental Health Sciences, Yale School of Public Health, Yale University, New Haven, USA

<sup>b</sup> Yale Center for Perinatal, Pediatric, and Environmental Epidemiology, Yale School of Public Health, New Haven, USA

<sup>c</sup> Department of Epidemiology, Fielding School of Public Health, University of California, Los Angeles (UCLA), Los Angeles, USA

<sup>d</sup> Harvey Cushing / John Hay Whitney Medical Library, Yale University, New Haven, USA

<sup>e</sup> Division of Pulmonary, Allergy, Critical Care and Sleep Medicine, Department of Medicine, Emory University School of Medicine, Atlanta, USA

<sup>f</sup> Department of Biochemistry, Emory University School of Medicine, Atlanta, USA

\*Corresponding Author

Zeyan Liew

Email: [zeyan.liew@yale.edu](mailto:zeyan.liew@yale.edu)

Address: 1 Church Street, New Haven, CT, 06510, USA

### **Contents**

#### **Appendix A. Search terms and database used.**

**Supplementary Table 1. Definitions of per- and polyfluoroalkyl substances (PFAS) mixtures from the studies reviewed.**

**Supplementary Table 2. Methodological and reporting quality of the studies reviewed.**

**Supplementary Table 3. A summary of statistical methods of the studies reviewed.**

**Supplementary Table 4. Analytical methods for PFAS exposure measurement.**

**Supplementary Figure 1. Scoring procedure for the reporting of exposure and metabolomics data.**

**Supplementary Figure 2. Venn diagrams of the commonly detected metabolic pathways associated with PFAS exposure by (A) sample type for metabolomics analysis, (B) study population, and (C) pathway analysis algorithm.**

#### **Abbreviations**

## Appendix A. Search terms and database used.

### Dimensions:

(PFAS OR PFASs OR perfluoro\* OR polyfluoro\* OR perfluorinated\* OR polyfluorinated\* OR PFOS OR PFOA OR PFNA OR PFHxS OR PFSA OR PFCA OR PFOSA OR PFDA OR PFUnDA OR PFDeA OR PFDoA OR PFHpA OR PFUDa OR EtFOSAA OR MeFOSAA) AND (metabolome OR metabolomics OR metabolic OR metabonomics) AND (non-targeted OR non-target OR untargeted OR untarget OR mwas OR metabolome-wide)

### Web of Science Core Collection as licensed at Yale:

TS=((PFAS OR PFASs OR perfluoro\* OR polyfluoro\* OR perfluorinated\* OR polyfluorinated\* OR PFOS OR PFOA OR PFNA OR PFHxS OR PFSA OR PFCA OR PFOSA OR PFDA OR PFUnDA OR PFDeA OR PFDoA OR PFHpA OR PFUDa OR EtFOSAA OR MeFOSAA) AND (metabolome OR metabolomics OR metabolic OR metabonomics) AND (non-targeted OR non-target OR untargeted OR untarget OR mwas OR metabolome-wide) )

The databases linked through the Web of Science (WOS) as licensed at Yale were:

#### Web of Science Core Collection: Citation Indexes

- Science Citation Index Expanded (SCI-EXPANDED) --1900-present
- Social Sciences Citation Index (SSCI) --1900-present
- Arts & Humanities Citation Index (A&HCI) --1975-present
- Conference Proceedings Citation Index- Science (CPCI-S) --1991-present
- Conference Proceedings Citation Index- Social Science & Humanities (CPCI-SSH) --1991-present
- Book Citation Index– Science (BKCI-S) --2005-present
- Book Citation Index– Social Sciences & Humanities (BKCI-SSH) --2005-present
- Emerging Sources Citation Index (ESCI) --2015-present

#### Web of Science Core Collection: Chemical Indexes

- Current Chemical Reactions (CCR-EXPANDED) --1985-present  
(Includes Institut National de la Propriete Industrielle structure data back to 1840)
- Index Chemicus (IC) --1993-present

### Embase via Ovid

| # | Query                                                                                                                                                                                                                         |
|---|-------------------------------------------------------------------------------------------------------------------------------------------------------------------------------------------------------------------------------|
| 1 | (non-targeted or non-target or untargeted or untarget or mwas or metabolome-wide).mp.                                                                                                                                         |
| 2 | (metabolome or metabolomics or metabolic or metabonomics).mp.                                                                                                                                                                 |
| 3 | exp metabolome/                                                                                                                                                                                                               |
| 4 | metabolomics/                                                                                                                                                                                                                 |
| 5 | (PFAS or PFASs or perfluoro* or polyfluoro* or perfluorinated* or polyfluorinated* or PFOS or PFOA or PFNA or PFHxS or PFSA or PFCA or PFOSA or PFDA or PFUnDA or PFDeA or PFDoA or PFHpA or PFUDa or EtFOSAA or MeFOSAA).mp. |
| 6 | exp perfluoroalkanoic acid/ or perfluorooctanesulfonic acid/ or perfluoro compound/                                                                                                                                           |
| 7 | 1 and (2 or 3 or 4) and (5 or 6)                                                                                                                                                                                              |

### Scopus

TITLE-ABS-

KEY ((( pfas OR pfass OR perfluoro\* OR polyfluoro\* OR perfluorinated\* OR polyfluorinated\* OR pfos OR pfoa OR pfna OR pfhxs OR pfsa OR pfca OR pfosa OR pfda OR pfunda OR pfdea OR pfdo a OR pfhpa OR pfuda OR etfosaa OR mefosaa) AND (metabolome OR metabolomics OR metabolic OR metabonomics) AND (non-targeted OR non-target OR untargeted OR untarget OR mwas OR metabolome-wide))) AND (EXCLUDE (SRCTYPE, "b") OR EXCLUDE (SRCTYPE, "re") OR EXCLUDE (SRCTYPE, "AGRI"))

**Supplementary Table 1. Definitions of per- and polyfluoroalkyl substances (PFAS) mixtures from the studies reviewed.**

| <b>Publication</b> | <b>PFAS mixture definition</b>                                                                                                                                                                                                                                                                                                                      |
|--------------------|-----------------------------------------------------------------------------------------------------------------------------------------------------------------------------------------------------------------------------------------------------------------------------------------------------------------------------------------------------|
| Schillemans 2021   | Two principal components (PC1 and PC 2) of six PFAS were derived using the principal component analysis. High loadings were observed for the long-chain PFDA, PFNA and PFUnDA in PC1 and for the shorter-chain PFHxS, PFOS and PFOA in PC2.                                                                                                         |
| Chen 2020          | n/a                                                                                                                                                                                                                                                                                                                                                 |
| Jin 2020           | A principal component analysis of 3 PFAS (PFOA, PFOS, PFHxS) was conducted and the first component (“PC1”), which explained 73.2% of the variance, was used as a composite variable representing PFAS burden.                                                                                                                                       |
| Li 2020            | A PFAS community (PFOA, PFOS, PFHxS, EtFOSA) detected among the chemical variables from the correlation network, which was defined by all pairs of variables with Spearman correlation coefficient above 0.5.                                                                                                                                       |
| Kingsley 2019      | n/a                                                                                                                                                                                                                                                                                                                                                 |
| Hu 2019            | n/a                                                                                                                                                                                                                                                                                                                                                 |
| Alderete 2019      | A principal component analysis of 3 PFAS (PFOA, PFOS, PFHxS) was conducted and the first component (“PC1”), which explained 96.7% of the variance, was used as a composite variable representing PFAS burden.                                                                                                                                       |
| Maitre 2018        | n/a                                                                                                                                                                                                                                                                                                                                                 |
| Salihovic 2019     | Total PFASs was constructed using the multivariable multiple regression (MMLR). All of the six PFASs (PFHxS, PFOS PFHpA, PFOA, PFNA, PFUdA) were included as independent variables and all metabolites were included as dependent variables. A significance testing was used to determine if the total metabolic profile differs between the PFASs. |
| Wang 2017          | A molarity sum of all the detected PFCs, expressed as the total PFCs, including PFOS, PFOA, PFDA, PFNA, PFUnA, PFHxS, PFHxA, PFBA, PFDoA, PFHpA, and PFBS.                                                                                                                                                                                          |
| Lu 2019            | Two kinds of total PFASs were used as mixtures: $\Sigma$ 6PFASs (PFBA, PFOA, PFBS, PFHxS, PFOS, 6:2 Cl-PFESA) and $\Sigma$ 13PFASs. The concentration of $\Sigma$ 6PFASs accounted for $99.7 \pm 0.6\%$ of the $\Sigma$ 13PFASs in the workers and for $88.6 \pm 18.2\%$ in the general population.                                                 |

**Supplementary Table 2. Methodological and reporting quality of the studies reviewed.**

| Publication      | 1. Study participants described | 2. PFAS exposure assessment and study design | 3. Sample collection and analysis | 4. Data processing workflow | 5. Certainty of metabolite identification | Total points |
|------------------|---------------------------------|----------------------------------------------|-----------------------------------|-----------------------------|-------------------------------------------|--------------|
| Schillemans 2021 | 1                               | 1                                            | 1                                 | 1                           | 1                                         | 5            |
| Chen 2020        | 1                               | 1                                            | 1                                 | 1                           | 1                                         | 5            |
| Jin 2020         | 1                               | 1                                            | 1                                 | 0                           | 0                                         | 3            |
| Li 2020          | 1                               | 1                                            | 1                                 | 1                           | 0                                         | 4            |
| Kingsley 2019    | 1                               | 1                                            | 1                                 | 1                           | 1                                         | 5            |
| Hu 2019          | 1                               | 1                                            | 1                                 | 0                           | 1                                         | 4            |
| Alderete 2019    | 1                               | 2                                            | 1                                 | 0                           | 0                                         | 4            |
| Maitre 2018      | 1                               | 2                                            | 1                                 | 1                           | 1                                         | 6            |
| Salihovic 2019   | 1                               | 1                                            | 1                                 | 1                           | 1                                         | 5            |
| Wang 2017        | 1                               | 1                                            | 1                                 | 1                           | 0                                         | 4            |
| Lu 2019          | 1                               | 1                                            | 1                                 | 1                           | 0                                         | 4            |

**Supplementary Table 3. A summary of statistical methods in the studies reviewed.**

| Publication      | Statistical models employed to assess the associations between PFAS and metabolites                                                | Covariates considered                                                                                                                                    | Additional analyses                                                                                                                                                                                                                                                                                                                                 |
|------------------|------------------------------------------------------------------------------------------------------------------------------------|----------------------------------------------------------------------------------------------------------------------------------------------------------|-----------------------------------------------------------------------------------------------------------------------------------------------------------------------------------------------------------------------------------------------------------------------------------------------------------------------------------------------------|
| Schillemans 2021 | Spearman's partial correlation ( <i>i.e.</i> , covariate-adjusted Spearman's rank correlation)                                     | sex, age, sample year, marital status, education, smoking status, physical activity and case-control status                                              | n/a                                                                                                                                                                                                                                                                                                                                                 |
| Chen 2020        | Linear regression                                                                                                                  | age, sex, parental education, race/ethnicity, cigarette and e-cigarette smoking status in the past week, physical activity levels and dietary covariates | The xMWAS integrated network analysis was used to investigate the associations among PFAS exposure levels, intensities of annotated metabolites, and cardiometabolic outcomes.<br><br>The Sobel test for mediation analysis was conducted to evaluate the mediation effect of specific metabolites identified in the targeted metabolomic analysis. |
| Jin 2020         | Linear regression                                                                                                                  | age, sex, ethnicity, and body mass index (BMI) Z-score                                                                                                   | /                                                                                                                                                                                                                                                                                                                                                   |
| Li 2020          | Hierarchical community network model                                                                                               | /                                                                                                                                                        | /                                                                                                                                                                                                                                                                                                                                                   |
| Kingsley 2019    | Linear regression                                                                                                                  | child age, sex, and race                                                                                                                                 | /                                                                                                                                                                                                                                                                                                                                                   |
| Hu 2019          | Linear regression                                                                                                                  | total cholesterol, age, and p,p'-DDE levels                                                                                                              | /                                                                                                                                                                                                                                                                                                                                                   |
| Alderete 2019    | Linear regression                                                                                                                  | baseline age, sex, and social position (selected by directed acyclic graphs)                                                                             | /                                                                                                                                                                                                                                                                                                                                                   |
| Maitre 2018      | Spearman's partial correlation                                                                                                     | gestational week, age and BMI                                                                                                                            | /                                                                                                                                                                                                                                                                                                                                                   |
| Salihovic 2019   | Multivariable multiple regression ( <i>i.e.</i> , modeling multiple dependent variables, with a single set of predictor variables) | all PFAS, sex, education level, smoking habits, exercise habits, energy intake and alcohol intake                                                        | Structural equation models were used to investigate a potential mediation of BMI on the relationship between PFAS and metabolites.                                                                                                                                                                                                                  |
| Wang 2017        | Spearman's partial correlation                                                                                                     | age, BMI, smoking and drinking status                                                                                                                    | /                                                                                                                                                                                                                                                                                                                                                   |
| Lu 2019          | Spearman's partial correlation                                                                                                     | age, BMI, gender, smoking, and drinking status                                                                                                           | /                                                                                                                                                                                                                                                                                                                                                   |

**Supplementary Table 4. Analytical methods for PFAS exposure measurement.**

| Publication      | Quality assurance and quality control procedure described | Lower limit of detection (LOD) (ng/mL)         | Reported measured PFAS | Reported frequency of detection (%)                                        | Statistical methods to address exposure values below the LOD                                                       |
|------------------|-----------------------------------------------------------|------------------------------------------------|------------------------|----------------------------------------------------------------------------|--------------------------------------------------------------------------------------------------------------------|
| Schillemans 2021 | Yes                                                       | 0.027-0.049 (Koponen et al., 2013)             | N/A                    | PFHxS, PFOS, PFOA, PFNA; PFDA (74), PFUDA (58)                             | Concentrations below the LOQ were set to the LOQ/2 = 0.075 ng/mL for 26% of the subjects in PFDA and 42% in PFUnDA |
| Chen 2020        | Yes; CV<0.10                                              | 0.02-0.1                                       | N/A                    | PFOA (100), PFOS (100), PFHxS (97.2)                                       | N/A                                                                                                                |
| Jin 2020         | Yes (Go et al., 2015.)                                    | 0.02-0.1                                       | N/A                    | PFOA (100), PFOS (100), PFHxS (94.6)                                       | Set to a value equal to the detection limit divided by the square root of 2                                        |
| Li 2020          | Yes (Cohn et al., 2020)                                   | 0.028-0.11                                     | 11 PFAS                | PFOS (100), PFOA (98), PFHxS (99), Others (1-50)                           | Set to missing                                                                                                     |
| Kingsley 2019    | Yes; CV~0.06 (Kato et al., 2014)                          | PFOS (0.2), PFNA (0.082), PFOA and PFHxS (0.1) | N/A                    | (100)                                                                      | All serum PFAS concentrations were greater than the LODs                                                           |
| Hu 2019          | N/A                                                       | N/A                                            | 11 PFAS                | PFOS, PFOA, PFHxS, and EtFOSAA (>75), Others (<50)                         | N/A                                                                                                                |
| Alderete 2019    | Yes (Go et al., 2015.)                                    | 0.02-0.1                                       | N/A                    | PFOA and PFOS (97.5), PFHxS (100)                                          | N/A                                                                                                                |
| Maitre 2018      | N/A                                                       | N/A                                            | 4 PFAS                 | PFHxS (~55), PFNA, PFOA, PFOS                                              | Set to the min value of the exposure divided by 2                                                                  |
| Salihovic 2019   | Yes (Salihovic et al., 2014)                              | 0.01–0.17                                      | 12 PFAS                | PFHxS, PFOS, PFHpA, PFOA, PFNA, PFUDA, PFOSA, and PFDA (>75), Others (<75) | N/A                                                                                                                |
| Wang 2017        | N/A                                                       | 0.06–0.14                                      | 11 PFAS                | PFOA, PFOS, PFDA, and PFNA (100), PFUDA (95), PFHxS (58.6), Others (0)     | N/A                                                                                                                |
| Lu 2019          | Yes (Gao et al., 2016)                                    | 0.008-0.19                                     | 21 PFAS                | PFOS and PFOA (100), PFBA, PFBS, PFHxS, 6:2 Cl-PFESA, Others (0)           | N/A                                                                                                                |

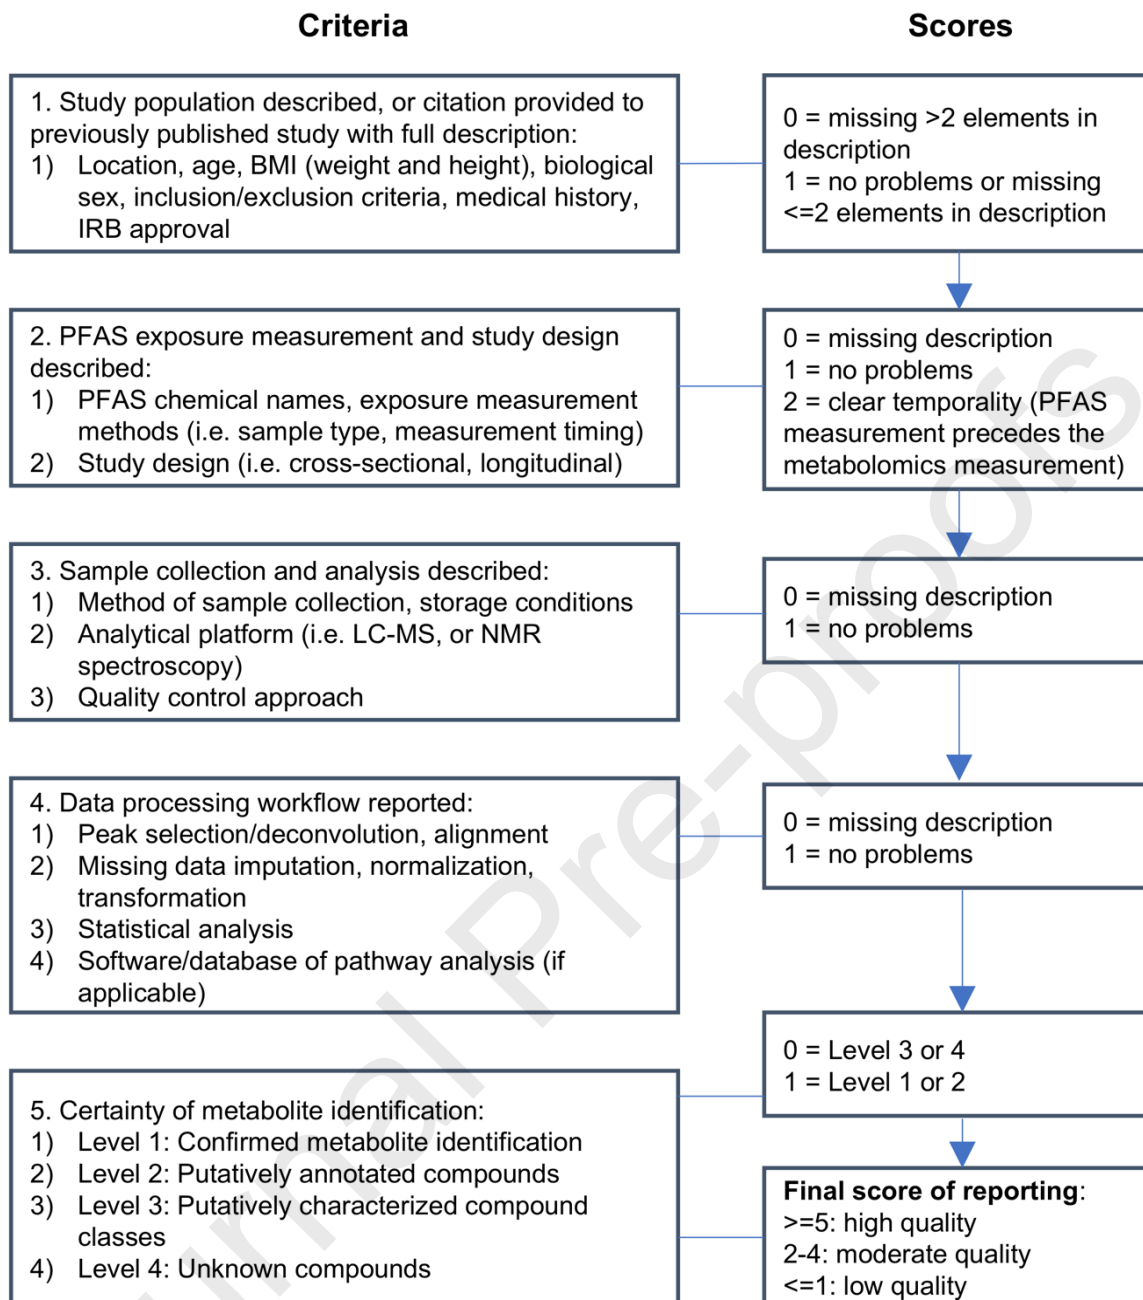

Supplementary Figure 1. Scoring procedure for the reporting of exposure and metabolomics data.

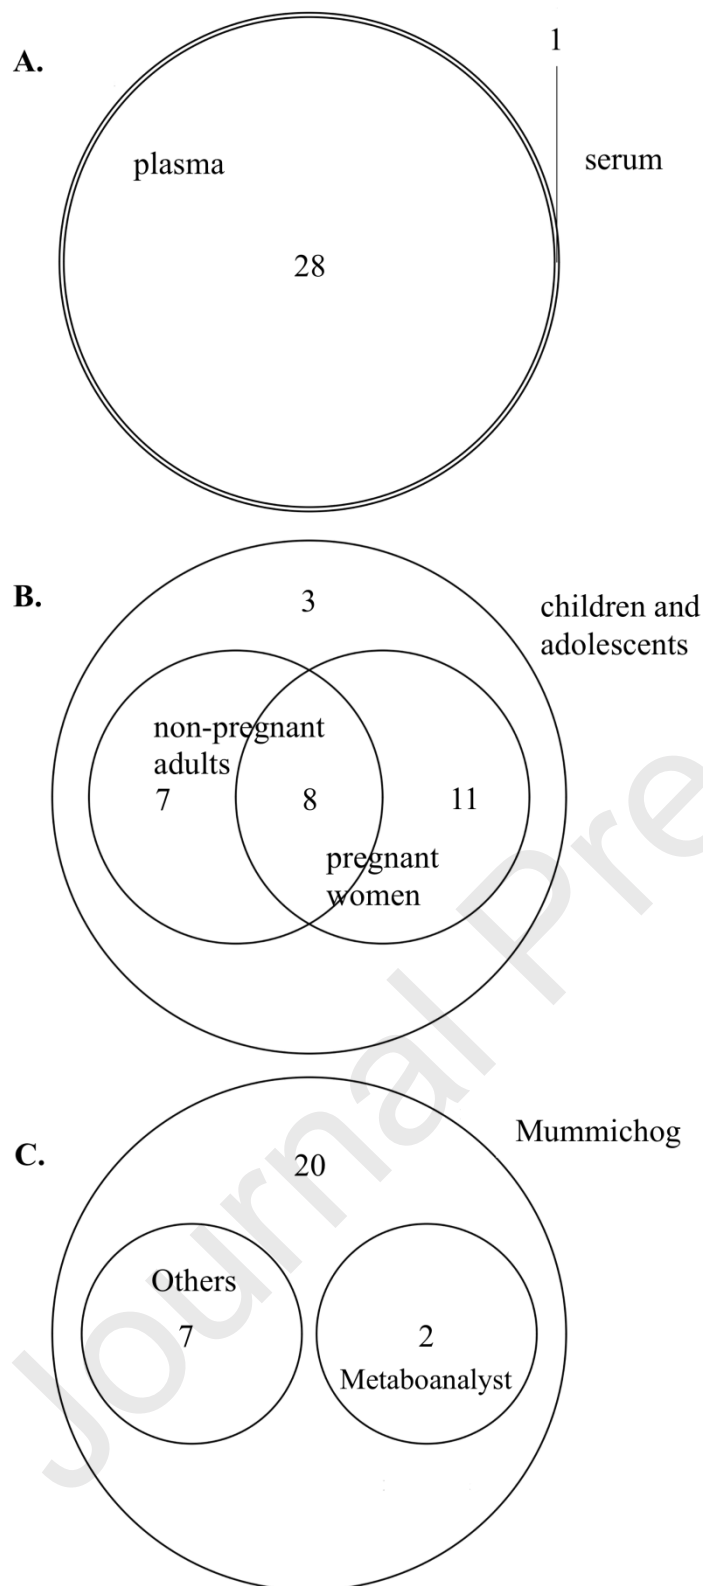

**Supplementary Figure 2. Venn diagrams of the commonly detected metabolic pathways associated with PFAS exposure by (A) sample type for metabolomics analysis, (B) study population, and (C) pathway analysis algorithm.** A total of 29 metabolic pathways associated with PFAS reported in at least three studies reviewed are included in the Venn diagrams. Each circle represents metabolic pathways associated with PFAS exposure in a specified group. The numbers listed in the circles represent the numbers of overlapping or non-overlapping pathways by study characteristics.
